# Supplementary material for: OSR1 disruption contributes to uterine factor infertility via impaired Müllerian duct development and endometrial receptivity
Source: PubMed Central journal article supplement (PMC10688984; doi:10.1172/jci161701), 2023-12-01
Supplement: jci-133-161701-s166.pdf [file jci-133-161701-s166.pdf]

## Supplemental Material

**Supplemental Table 1.** Results of weekly hormone measurements and pelvic ultrasound scans of three sisters with a complex Mullerian anomaly.<sup>1</sup>

|                                                  | II.4 (proband) |      |                         |            | II.5        |             |            |      | II.6 <sup>6</sup> |      |      |             | Normal values <sup>2</sup>                            |
|--------------------------------------------------|----------------|------|-------------------------|------------|-------------|-------------|------------|------|-------------------|------|------|-------------|-------------------------------------------------------|
|                                                  | Wk 1           | Wk 2 | Wk 3                    | Wk 4       | Wk 1        | Wk 2        | Wk 3       | Wk 4 | Wk 1              | Wk 2 | Wk 3 | Wk 4        |                                                       |
| <b>FSH</b><br>(mIU/mL)                           | 10.0           | 7.5  | 16.5                    | 5.2        | 9.6         | 8.6         | 3.3        | 12.3 | 7.9               | 10.0 | 7.9  | 6.1         | F: 2.5 - 10.2<br>M: 3.4 - 33.4<br>L: 1.5 - 9.1        |
| <b>LH</b><br>(mIU/mL)                            | 4.9            | 6.6  | <b>37.6<sup>5</sup></b> | 4.3        | <b>21.0</b> | <b>15.6</b> | 3.9        | 10.2 | 3.9               | 8.0  | 7.9  | <b>14.9</b> | F: 1.9 - 12.5<br>M: 8.7 - 76.3<br>L: 0.5 - 16.9       |
| <b>E2</b><br>(pg/mL)                             | 7.0            | 22.9 | 46.8                    | 54.6       | 87.9        | 63.7        | 138.1      | 53.7 | 10.1              | 7.0  | 35.8 | 436.3       | F: 19.5 - 144.2<br>M: 63.9 - 356.7<br>L: 55.8 - 214.2 |
| <b>P4</b><br>(ng/mL)                             | 0.2            | <0.2 | 0.7                     | <b>8.7</b> | <0.2        | <b>7.2</b>  | <b>5.7</b> | 0.6  | 0.2               | <0.2 | <0.2 | 0.3         | F: 0.15 - 1.40<br>L: 3.3 - 25.5                       |
| <b>Endometrium<sup>3</sup></b><br>(mm)           | 1              | 1    | 3                       | 3          | 0           | 1           | 0          | 2.2  | 0                 | 1    | 1    | 2.4         | F: 4.0 - 8.0<br>L: 8.0 - 12.0                         |
| <b>Ovarian<br/>Follicles<sup>4</sup></b><br>(mm) | 10             | 12   | CL                      | 3          | 12          | 5           | 6          | 6    | 10                | 7    | 10   | CL          | variable                                              |
| <b>Uterus</b><br>(cm <sup>3</sup> )              | 13             | 18   | 18                      | 18         | 14          | 19          | 15         | 18   | 20                | 20   | 17   | 19          | nulliparous:<br>28 – 65                               |

<sup>1</sup>Ultrasonographic monitoring was performed weekly, by the same ultra-sonographer, for 4 weeks (Wk 1-4).

<sup>2</sup>Normal values for adult women (chemiluminescent assays). F: Follicular phase; M: Midcycle; L: Luteal phase.

<sup>3</sup>Endometrial thickness. "0" means undetectable. F: Follicular phase; L: Luteal phase.

<sup>4</sup>Maximum diameter of the detected ovarian follicles; CL: corpus luteum.

<sup>5</sup>LH levels in the midcycle ovulatory range and progesterone levels in the luteal range are highlighted in bold.

<sup>6</sup>Data suggest that blood draw was performed during the downswing of the LH surge with corresponding rises in P4 from <0.2 to 0.3 and LH from 7.9 to 14.9. Ovulation may have just occurred, resulting in the identification of a corpus luteum.

**Supplemental Table 2.** GTEEx uterine sample IDs, tissue donor age brackets and GTEEx pathology notes.

| <b>Tissue Sample ID</b>  | <b>Tissue</b> | <b>Age Bracket</b> | <b>GTEEx Pathology Notes</b>                                                                              |
|--------------------------|---------------|--------------------|-----------------------------------------------------------------------------------------------------------|
| GTEX-113JC-2226-SM-5EGJG | Uterus        | 50-59              | 2 pieces; atrophic endometrium                                                                            |
| GTEX-12WSD-2826-SM-59HKT | Uterus        | 60-69              | 2 pieces, all myometrium, no viable endometrium. Prominent vessels, suspect aliquots from serosal surface |
| GTEX-12ZZX-2126-SM-5LZVL | Uterus        | 40-49              | 2 pieces, myometrium only, no endometrium noted                                                           |
| GTEX-1313W-2826-SM-5P9G1 | Uterus        | 50-59              | 2 pieces, myometrium only                                                                                 |
| GTEX-13N11-1126-SM-5KM41 | Uterus        | 50-59              | 2 pieces; myometrium only in this section                                                                 |
| GTEX-14PJM-2826-SM-69LPV | Uterus        | 50-59              | 2 pieces; atrophic endometrium and myometrium                                                             |
| GTEX-15ER7-2426-SM-793B9 | Uterus        | 20-29              | 2 pieces; myometrium only in this section                                                                 |
| GTEX-1A32A-2826-SM-72D5S | Uterus        | 50-59              | 2 pieces; largely vascularized myometrium with no endometrium in these cuts                               |
| GTEX-1A8FM-2326-SM-7MKGC | Uterus        | 50-59              | 2 pieces; atrophic endometrium occupies 20% of 1 piece, 10% of other                                      |
| GTEX-1H1CY-2126-SM-9OSXV | Uterus        | 60-69              | 2 pieces; myometrium only; no endometrium                                                                 |
| GTEX-1PBJI-2326-SM-E6CP6 | Uterus        | 20-29              | 2 pieces, myometrium only                                                                                 |
| GTEX-T2IS-2226-SM-4DM65  | Uterus        | 20-29              | 2 pieces, ~8mm x 8mm. 2x2mm focus of totally autolyzed endometrium in one aliquot                         |
| GTEX-YJ8O-1126-SM-5P9IS  | Uterus        | 40-49              | 2 pieces, all myometrium                                                                                  |
| GTEX-ZAK1-2526-SM-5S2N7  | Uterus        | 50-59              | 2 pieces, myometrium, no viable endometrium noted                                                         |

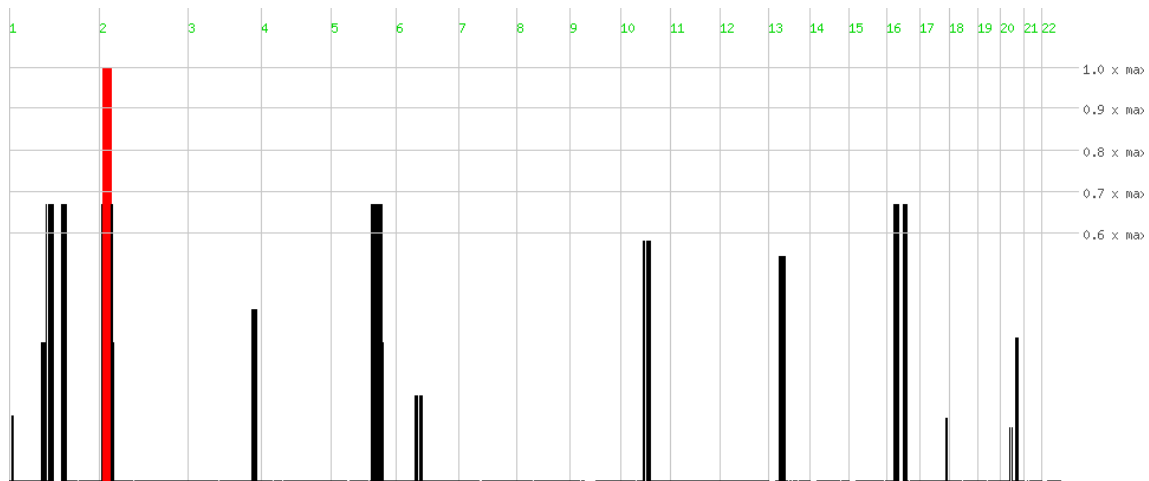

**Supplemental Figure 1. Results of homozygosity mapping.** Homozygosity mapping was performed from whole exome sequencing data using HomozygosityMapper. The X axis represents chromosomes in which the selected variants that were mapped were located (chromosome numbers are indicated in green across top of chart). Homozygosity scores (normalized to the lead peak, indicated to the right of the chart) are represented on the Y axis. The highest scoring peak is shown in red, while less highly scoring peaks are in black.

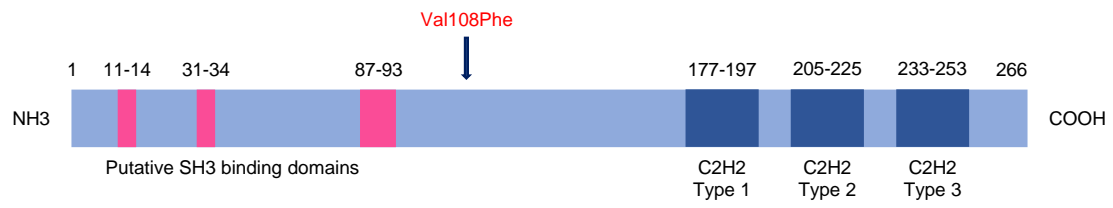

**Supplemental Figure 2.** Schematic representation of OSR1 domains, with the location of the homozygous mutation (marked in red) identified in three sisters with uterine hypoplasia and estrogen-unresponsive endometrium; two of the sisters also had tubal pregnancies. SH3: Src homology 3; C2H2: Cys<sub>2</sub>His<sub>2</sub> zinc finger domain.

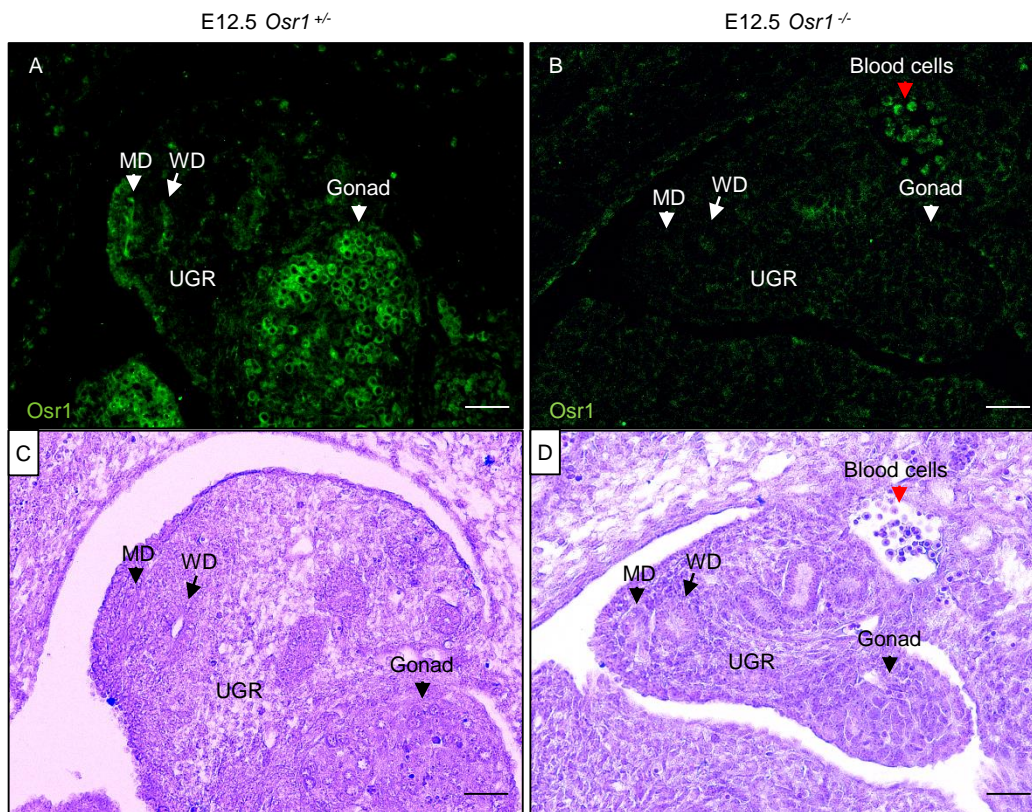

**Supplemental Figure 3. Validation of the anti-Osr1/OSR1 antibody.** The rabbit polyclonal anti-Osr1/OSR1 antibody (Thermo Fisher Scientific, PA5-116814) was validated using E12.5 *Osr1*<sup>+/+</sup> and *Osr1*<sup>-/-</sup> embryos (n=3/group). *Osr1* immunoreactivity (*green*) was detected in the MDs, WDs and gonads of *Osr1*<sup>+/+</sup> embryos (**A**), but not in the same structures of *Osr1*<sup>-/-</sup> embryos (**B**). Red arrows indicate auto-fluorescent blood cells (*green*). H&E-stained sections of *Osr1*<sup>+/+</sup> (**C**) and *Osr1*<sup>-/-</sup> (**D**) embryos. MD, Mullerian duct; WD, Wolf duct; UGR, urogenital ridge; H&E, hematoxylin and eosin stain. Scale bars: 100µm.

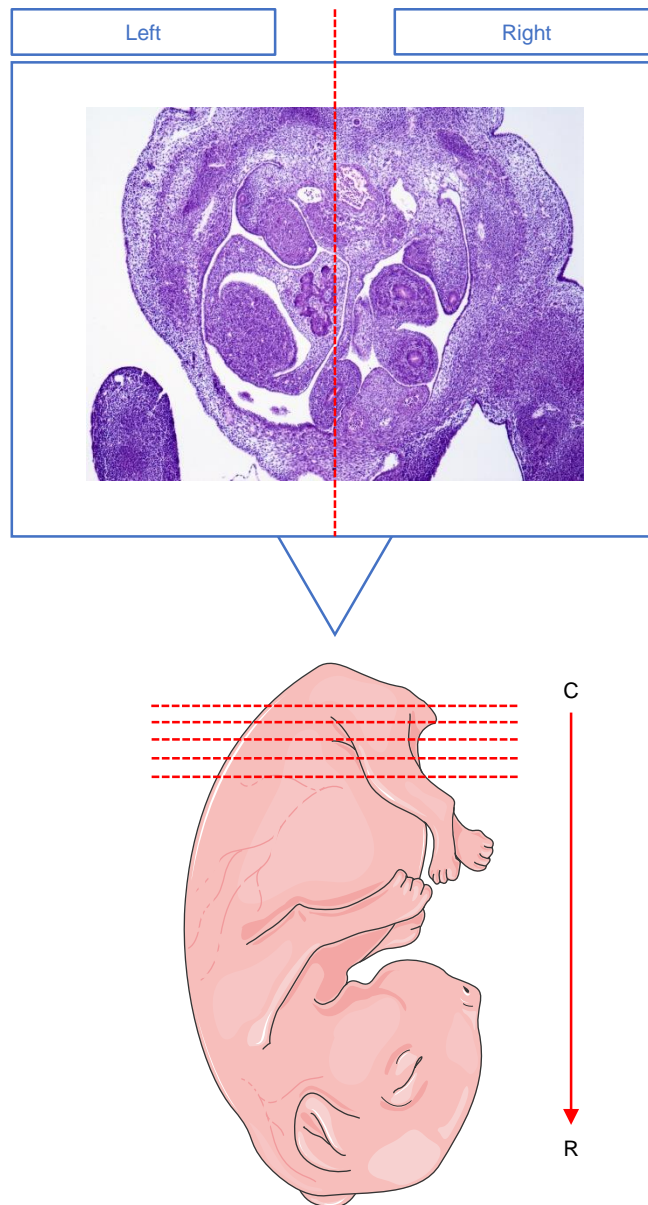

**Supplemental Figure 4. Schematic representation of embryo section preparation.** All embryos were sectioned from caudal (C) to rostral (R) (head down) allowing the identification of their right and left sides (created from Servier medical arts - <https://smart.servier.com>).
